# Supplementary material for: Adding natural regeneration and trait-based models on the functional trajectory analysis for monitoring tropical forests under ecological restoration
Source: Research Square preprint supplement (doi:10.21203/rs.3.rs-5328053/v1), 2024-12-16

**Adding natural regeneration and trait-based models on the functional trajectory analysis for monitoring tropical forests under ecological restoration**

*Journal:* Environmental Monitoring and Assessment

Adriana P. Manhães\*, Mariana Saavedra, Marcelo P. Pansonato, Moab T. Andrade, Beatriz Camelo, Frederico Machado, Jorge Eduardo Paes, Jerônimo B. B. Sansevero, Adriana Martini, Dulce Mantuano

\* Corresponding author

Email: [drimanhaes@gmail.com](mailto:drimanhaes@gmail.com)

Address: Plant Ecophysiology Laboratory, Biology Institute, Federal University of Rio de Janeiro, Av. Carlos Chagas Filho, #373, 21941-902, Rio de Janeiro, RJ, Brazil

Phylogenetic tree of 289 species from 55 botanic families

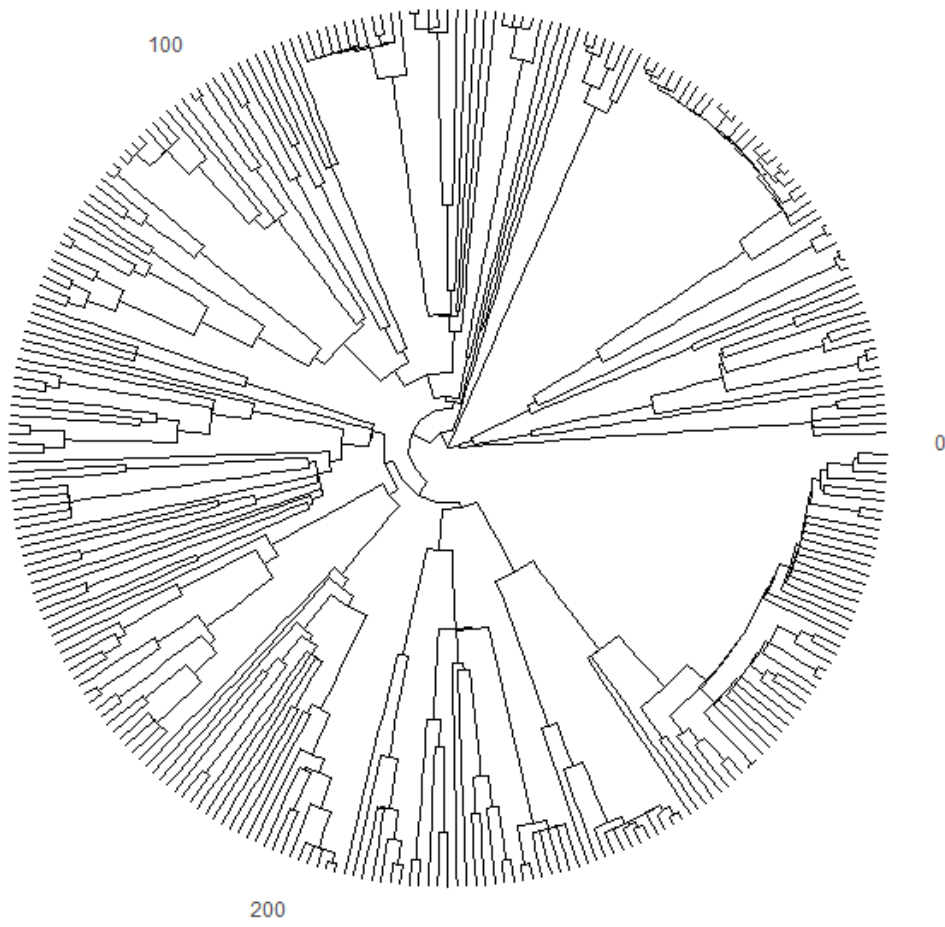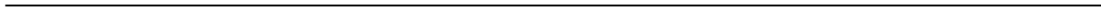

Supplement: Supplementary file 1 [file 03ff4325c86847cc259203c4.pdf]
