# Supplementary material for: Adding natural regeneration and trait-based models on the functional trajectory analysis for monitoring tropical forests under ecological restoration
Source: Research Square preprint supplement (doi:10.21203/rs.3.rs-5328053/v1), 2024-12-16
Supplement: Supplementary file 2 [file 5e6238e5d7fc6855907d3915.pdf]

**Adding natural regeneration and trait-based models on the functional trajectory analysis for monitoring tropical forests under ecological restoration**

*Journal:* Environmental Monitoring and Assessment

Adriana P. Manhães\*, Mariana Saavedra, Marcelo P. Pansonato, Moab T. Andrade, Beatriz Camelo, Frederico Machado, Jorge Eduardo Paes, Jerônimo B. B. Sansevero, Adriana Martini, Dulce Mantuano

\* Corresponding author

Email: [drimanhaes@gmail.com](mailto:drimanhaes@gmail.com)

Address: Plant Ecophysiology Laboratory, Biology Institute, Federal University of Rio de Janeiro, Av. Carlos Chagas Filho, #373, 21941-902, Rio de Janeiro, RJ, Brazil

## Species list of the reference ecosystem

| Botanic family  | Scientific name                                     |
|-----------------|-----------------------------------------------------|
| Anacardiaceae   | <i>Tapirira guianensis</i> Aubl.                    |
| Annonaceae      | <i>Anaxagorea dolichocarpa</i> Sprague & Sandwith   |
| Annonaceae      | <i>Guatteria australis</i> A.St.-Hil.               |
| Annonaceae      | <i>Xylopia langsdorffiana</i> A.St.-Hil. & Tul.     |
| Aquifoliaceae   | <i>Ilex theezans</i> Mart. ex Reissek               |
| Aquifoliaceae   | <i>Ilex dumosa</i> Reissek                          |
| Aquifoliaceae   | <i>Ilex pseudobuxus</i> Reissek                     |
| Araliaceae      | <i>Didymopanax angustissimum</i> Marchal            |
| Araliaceae      | <i>Dendropanax monogynus</i> (Vell.) Seem.          |
| Araliaceae      | <i>Oreopanax capitatus</i> (Jacq.) Decne. & Planch. |
| Arecaceae       | <i>Euterpe edulis</i> Mart.                         |
| Arecaceae       | <i>Bactris setosa</i> Mart.                         |
| Arecaceae       | <i>Astrocaryum aculeatissimum</i> (Schott) Burret   |
| Arecaceae       | <i>Geonoma schottiana</i> Mart.                     |
| Arecaceae       | <i>Attalea dubia</i> (Mart.) Burret                 |
| Bignoniaceae    | <i>Tabebuia cassinoides</i> (Lam.) DC.              |
| Bignoniaceae    | <i>Jacaranda puberula</i> Cham.                     |
| Bignoniaceae    | <i>Handroanthus albus</i> (Cham.) Mattos            |
| Bignoniaceae    | <i>Handroanthus umbellatus</i> (Sond.) Mattos       |
| Calophyllaceae  | <i>Calophyllum brasiliense</i> Cambess.             |
| Celastraceae    | <i>Monteverdia gonoclada</i> (Mart.) Biral          |
| Clethraceae     | <i>Clethra scabra</i> Pers.                         |
| Cyatheaceae     | <i>Cyathea atrovirens</i> (Langsd. & Fisch.) Domin  |
| Ebenaceae       | <i>Diospyros brasiliensis</i> Mart. ex Miq.         |
| Elaeocarpaceae  | <i>Sloanea guianensis</i> (Aubl.) Benth.            |
| Euphorbiaceae   | <i>Alchornea triplinervia</i> (Spreng.) Mull.Arg.   |
| Euphorbiaceae   | <i>Mabea piriri</i> Aubl.                           |
| Euphorbiaceae   | <i>Aparisthium cordatum</i> (A.Juss.) Baill.        |
| Euphorbiaceae   | <i>Maprounea guianensis</i> Aubl.                   |
| Fabaceae        | <i>Andira fraxinifolia</i> Benth.                   |
| Fabaceae        | <i>Pterocarpus rohrii</i> Vahl                      |
| Fabaceae        | <i>Ormosia arborea</i> (Vell.) Harms                |
| Fabaceae        | <i>Inga striata</i> Benth.                          |
| Fabaceae        | <i>Hymenolobium janeirensense</i> Kuhlmann          |
| Fabaceae        | <i>Inga edulis</i> Mart.                            |
| Fabaceae        | <i>Albizia pedicellaris</i> (DC.) L.Rico            |
| Lacistemataceae | <i>Lacistema lucidum</i> Schnizl.                   |
| Lamiaceae       | <i>Vitex polygama</i> Cham.                         |
| Lauraceae       | <i>Nectandra oppositifolia</i> Nees                 |
| Lauraceae       | <i>Aniba viridis</i> Mez                            |
| Lauraceae       | <i>Endlicheria paniculata</i> (Spreng.) J.F.Macbr.  |
| Lauraceae       | <i>Ocotea venulosa</i> (Nees) Baitello              |
| Lauraceae       | <i>Ocotea mosenii</i> Mez                           |

|                 |                                                          |
|-----------------|----------------------------------------------------------|
| Lauraceae       | <i>Ocotea aciphylla</i> (Nees & Mart.) Mez               |
| Lauraceae       | <i>Ocotea lanata</i> (Nees & Mart.) Mez                  |
| Lauraceae       | <i>Aiouea saligna</i> Meisn.                             |
| Lauraceae       | <i>Cryptocarya mandioccana</i> Meisn.                    |
| Lauraceae       | <i>Persea willdenovii</i> Kosterm.                       |
| Lauraceae       | <i>Ocotea pulchella</i> (Nees & Mart.) Mez               |
| Malvaceae       | <i>Eriotheca pentaphylla</i> (Vell. & K.Schum.) A.Robyns |
| Melastomataceae | <i>Miconia prasina</i> (Sw.) DC.                         |
| Melastomataceae | <i>Miconia cinnamomifolia</i> (DC.) Naudin               |
| Melastomataceae | <i>Miconia pusilliflora</i> (DC.) Naudin                 |
| Meliaceae       | <i>Guarea macrophylla</i> Vahl                           |
| Monimiaceae     | <i>Mollinedia schottiana</i> (Spreng.) Perkins           |
| Moraceae        | <i>Sorocea jureiana</i> Romaniuc                         |
| Moraceae        | <i>Ficus pulchella</i> Schott                            |
| Moraceae        | <i>Ficus gomelleira</i> Kunth                            |
| Myrtaceae       | <i>Eugenia monosperma</i> Vell.                          |
| Myrtaceae       | <i>Myrcia racemosa</i> (O.Berg) Kiaersk.                 |
| Myrtaceae       | <i>Eugenia neoglomerata</i> Sobral                       |
| Myrtaceae       | <i>Eugenia oblongata</i> O.Berg                          |
| Myrtaceae       | <i>Myrcia pubipetala</i> Miq.                            |
| Myrtaceae       | <i>Myrcia splendens</i> (Sw.) DC.                        |
| Myrtaceae       | <i>Myrcia multipunctata</i> Mazine                       |
| Myrtaceae       | <i>Calyptranthes lucida</i> Mart. ex DC.                 |
| Myrtaceae       | <i>Eugenia astringens</i> Cambess.                       |
| Myrtaceae       | <i>Myrcia strigipes</i> Mart.                            |
| Myrtaceae       | <i>Myrcia brasiliensis</i> Kiaersk.                      |
| Myrtaceae       | <i>Myrcia spectabilis</i> DC.                            |
| Myrtaceae       | <i>Myrcia vellozoi</i> Mazine                            |
| Myrtaceae       | <i>Eugenia stigmatisata</i> DC.                          |
| Myrtaceae       | <i>Eugenia sulcata</i> Spring ex Mart.                   |
| Myrtaceae       | <i>Myrcia glabra</i> (O.Berg) D.Legrand                  |
| Myrtaceae       | <i>Eugenia cerasiflora</i> Miq.                          |
| Myrtaceae       | <i>Myrcia multiflora</i> (Lam.) DC.                      |
| Myrtaceae       | <i>Eugenia cereja</i> D.Legrand                          |
| Myrtaceae       | <i>Psidium cattleianum</i> Sabine                        |
| Myrtaceae       | <i>Blepharocalyx salicifolius</i> (Kunth) O.Berg         |
| Myrtaceae       | <i>Syzygium jambos</i> (L.) Alston                       |
| Nyctaginaceae   | <i>Guapira opposita</i> (Vell.) Reitz                    |
| Nyctaginaceae   | <i>Pisonia</i> L.                                        |
| Nyctaginaceae   | <i>Guapira hirsuta</i> (Choisy) Lundell                  |
| Olacaceae       | <i>Heisteria silvianii</i> Schwacke                      |
| Peraceae        | <i>Pera glabrata</i> (Schott) Baill.                     |
| Phyllanthaceae  | <i>Hyeronima alchorneoides</i> Allemão                   |
| Piperaceae      | <i>Piper gaudichaudianum</i> Kunth                       |
| Primulaceae     | <i>Stylogyne Ihotzkyana</i> (A.DC.) Mez                  |
| Primulaceae     | <i>Myrsine coriacea</i> (Sw.) R.Br. ex Roem. & Schult.   |

|               |                                                                 |
|---------------|-----------------------------------------------------------------|
| Primulaceae   | <i>Myrsine guianensis</i> (Aubl.) Kuntze                        |
| Primulaceae   | <i>Myrsine venosa</i> A.DC.                                     |
| Rubiaceae     | <i>Amaioua intermedia</i> Mart. ex Schult. & Schult.f.          |
| Rubiaceae     | <i>Posoqueria latifolia</i> (Rudge) Schult.                     |
| Rubiaceae     | <i>Rudgea coriacea</i> (Spreng.) K.Schum.                       |
| Rubiaceae     | <i>Cordia myrciifolia</i> (K.Schum.) C.H.Perss. & Delprete      |
| Rubiaceae     | <i>Psychotria hoffmannseggiana</i> (Willd ex Schult.) Mull.Arg. |
| Sapindaceae   | <i>Matayba intermedia</i> Radlk.                                |
| Sapotaceae    | <i>Pouteria beaurepairei</i> (Glaz. & Raunk.) Baehni            |
| Sapotaceae    | <i>Manilkara subsericea</i> (Mart.) Dubard                      |
| Sapotaceae    | <i>Ecclinusa ramiflora</i> Mart.                                |
| Sapotaceae    | <i>Pouteria psammophila</i> (Mart.) Radlk.                      |
| Styracaceae   | <i>Styrax glabratus</i> Schott                                  |
| Thymelaeaceae | <i>Daphnopsis schwackeana</i> Taub.                             |
| Urticaceae    | <i>Coussapoa microcarpa</i> (Schott) Rizzini                    |
| Urticaceae    | <i>Cecropia glaziovii</i> Snethl.                               |
| Urticaceae    | <i>Cecropia pachystachya</i> Trécul                             |

---
